# Supplementary material for: Multi-wavelength light emission from InGaN nanowires on pyramid-textured Si(100) substrate grown by stationary plasma-assisted molecular beam epitaxy
Source: Royal Society of Chemistry journal article supplement (doi:10.1039/d0nr00071j), 2020-01-01
Supplement: d0nr00071j1.pdf [file d0nr00071j1.pdf]

## Supporting Information

### **Multi-wavelength light emission from InGaN nanowires on pyramid-textured Si (100) substrate grown by stationary plasma-assisted molecular beam epitaxy**

Peng Wang<sup>1</sup>, Hedong Chen<sup>1</sup>, Hao Wang<sup>4</sup>, Xingyu Wang<sup>1</sup>, Hongjie Yin<sup>1</sup>, Lujia Rao<sup>1</sup>, Guofu Zhou<sup>\*1,2,3</sup> and Richard Nötzel<sup>\*1,2</sup>

<sup>1</sup>Guangdong Provincial Key Laboratory of Optical Information Materials and Technology, South China Academy of Advanced Optoelectronics, South China Normal University, Guangzhou 510006, People's Republic of China

<sup>2</sup>National Center for International Research on Green Optoelectronics, South China Normal University, Guangzhou 510006, People's Republic of China

<sup>3</sup>Academy of Shenzhen Guohua Optoelectronics, Shenzhen 518110, People's Republic of China

<sup>4</sup> Research Institute for Soft Matter and Biomimetics, Fujian Provincial Key Laboratory for Soft Functional Materials Research, Department of Physics, Xiamen University, Xiamen 361005, China

Corresponding authors:

Email: guofu.zhou@m.scnu.edu.cn

Email: richard.noetzel@scnu.edu.cn

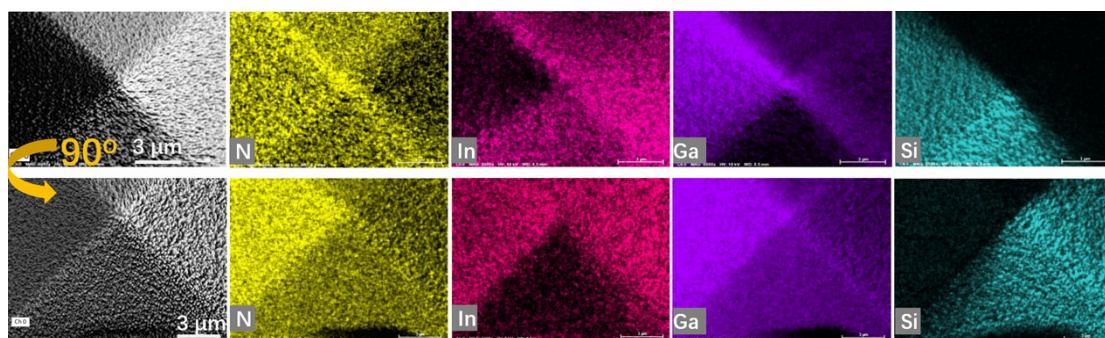

Figure S1. EDX element mapping results for 90° rotation of a sample grown at higher temperature

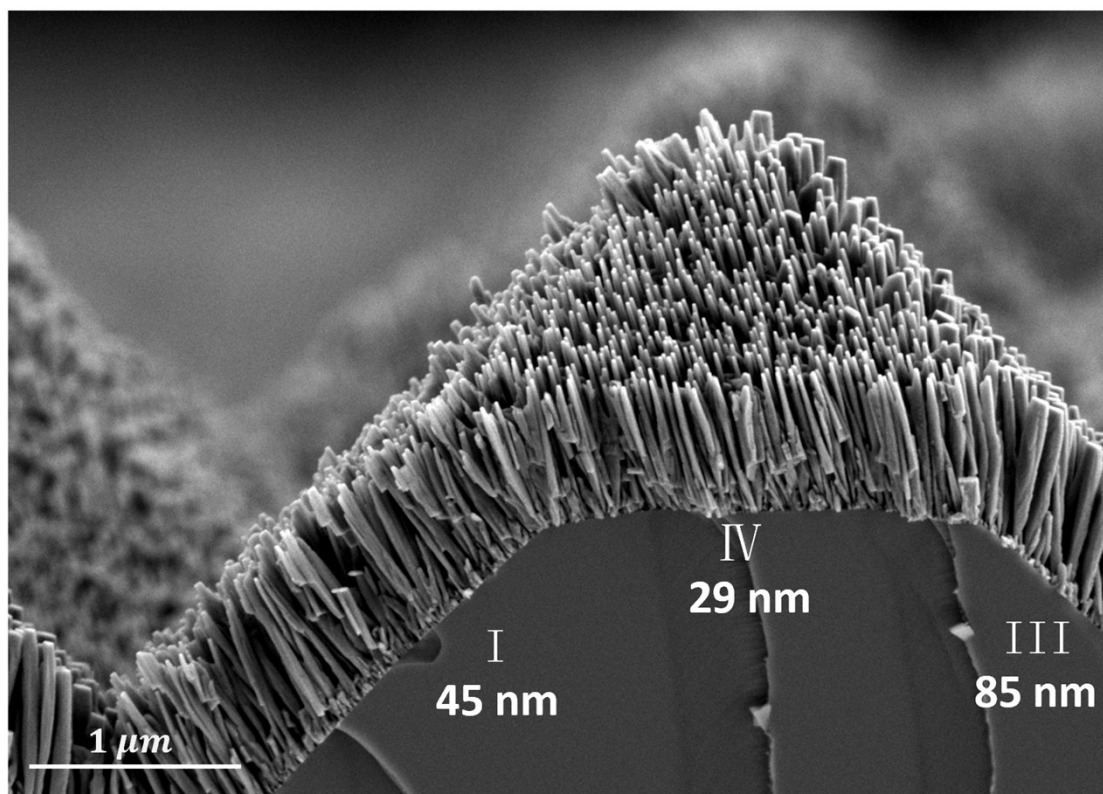

Figure S2. SEM cross-sectional image of the InGaN NWs on pyramid textured Si (100) substrate grown at 660°C. Three pyramid facets are exposed labeled I, III and IV, as in Fig. 3. The average nanowire diameter are also indicated. The pyramid shown here and that in Fig. 3 have similar size. Experimentally, pyramids of similar size exhibit similar In contents of the NWs on respective facets with variations well within the fluctuations of the In contents for individual facets.

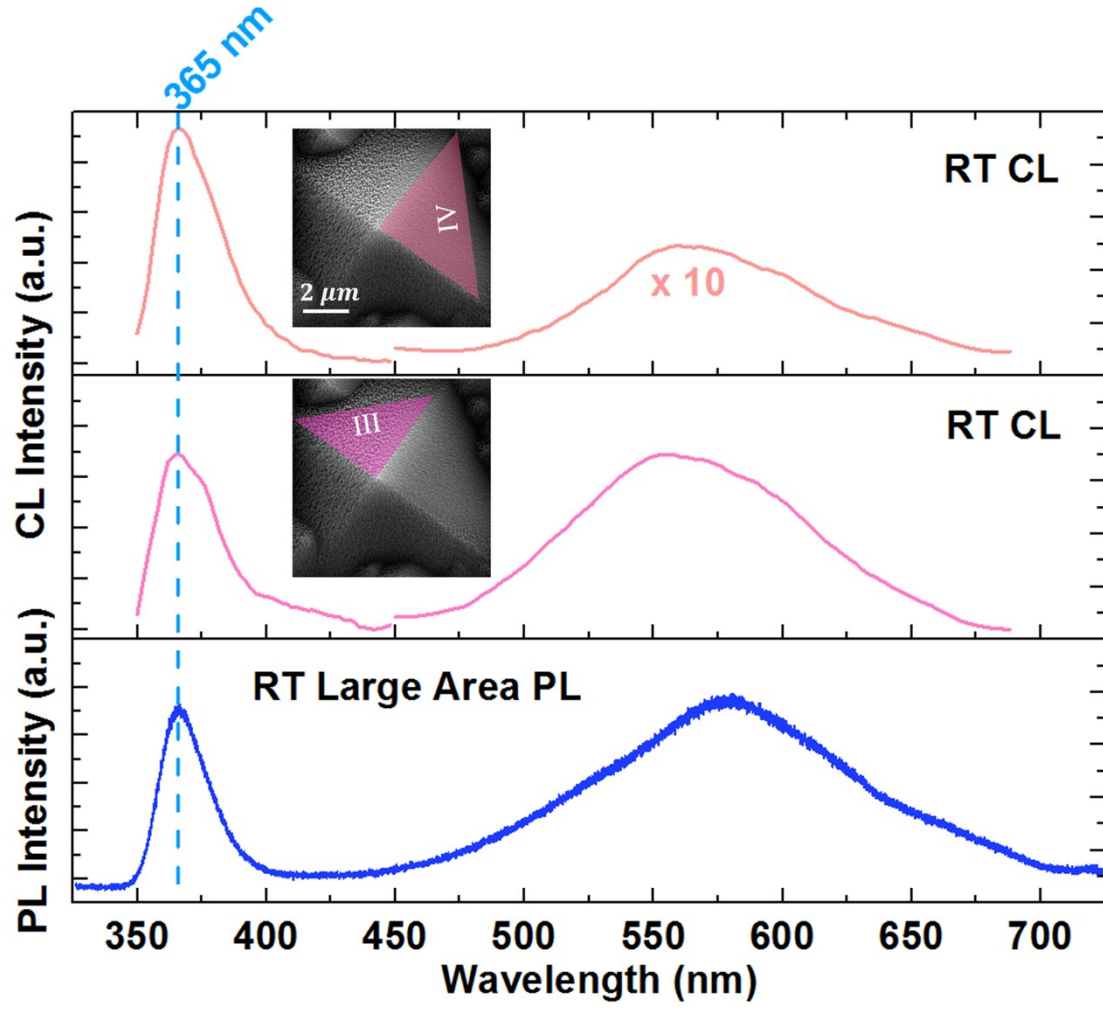

Figure S3. Extended range local area CL spectra taken at RT of InGaN NWs on Si pyramid facets IV (top) and III (middle), as indicated in the SEM images in the insets and in Fig. 6 (c). The emission peaked at 365nm is due to pure GaN. Extended range large area RT PL spectrum (bottom), supplementing the CL measurements.

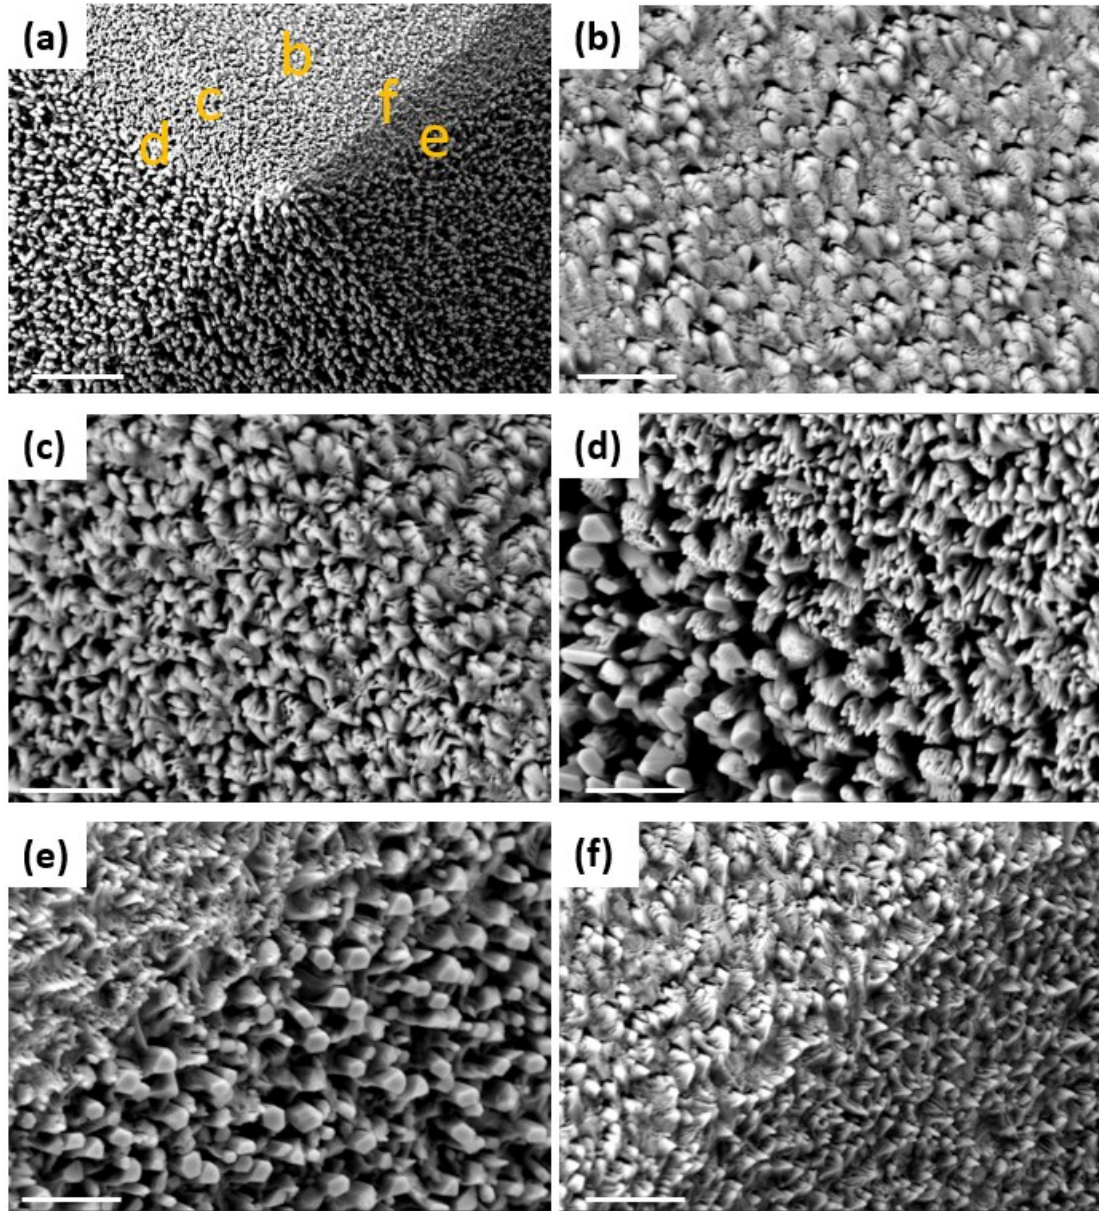

Figure S4. (a) SEM top-view image of InGaN NWs grown at 700°C on the Si pyramid in Fig. 8 (a) with larger magnification. (b-f) Zoomed-in SEM top-view images of the areas labeled b, c, d, e and f in (a). Scale bar indicate 2  $\mu\text{m}$  in (a) and 0.5  $\mu\text{m}$  (b-f).
